# Supplementary material
Source: PubMed Central journal article supplement (PMC3326403)

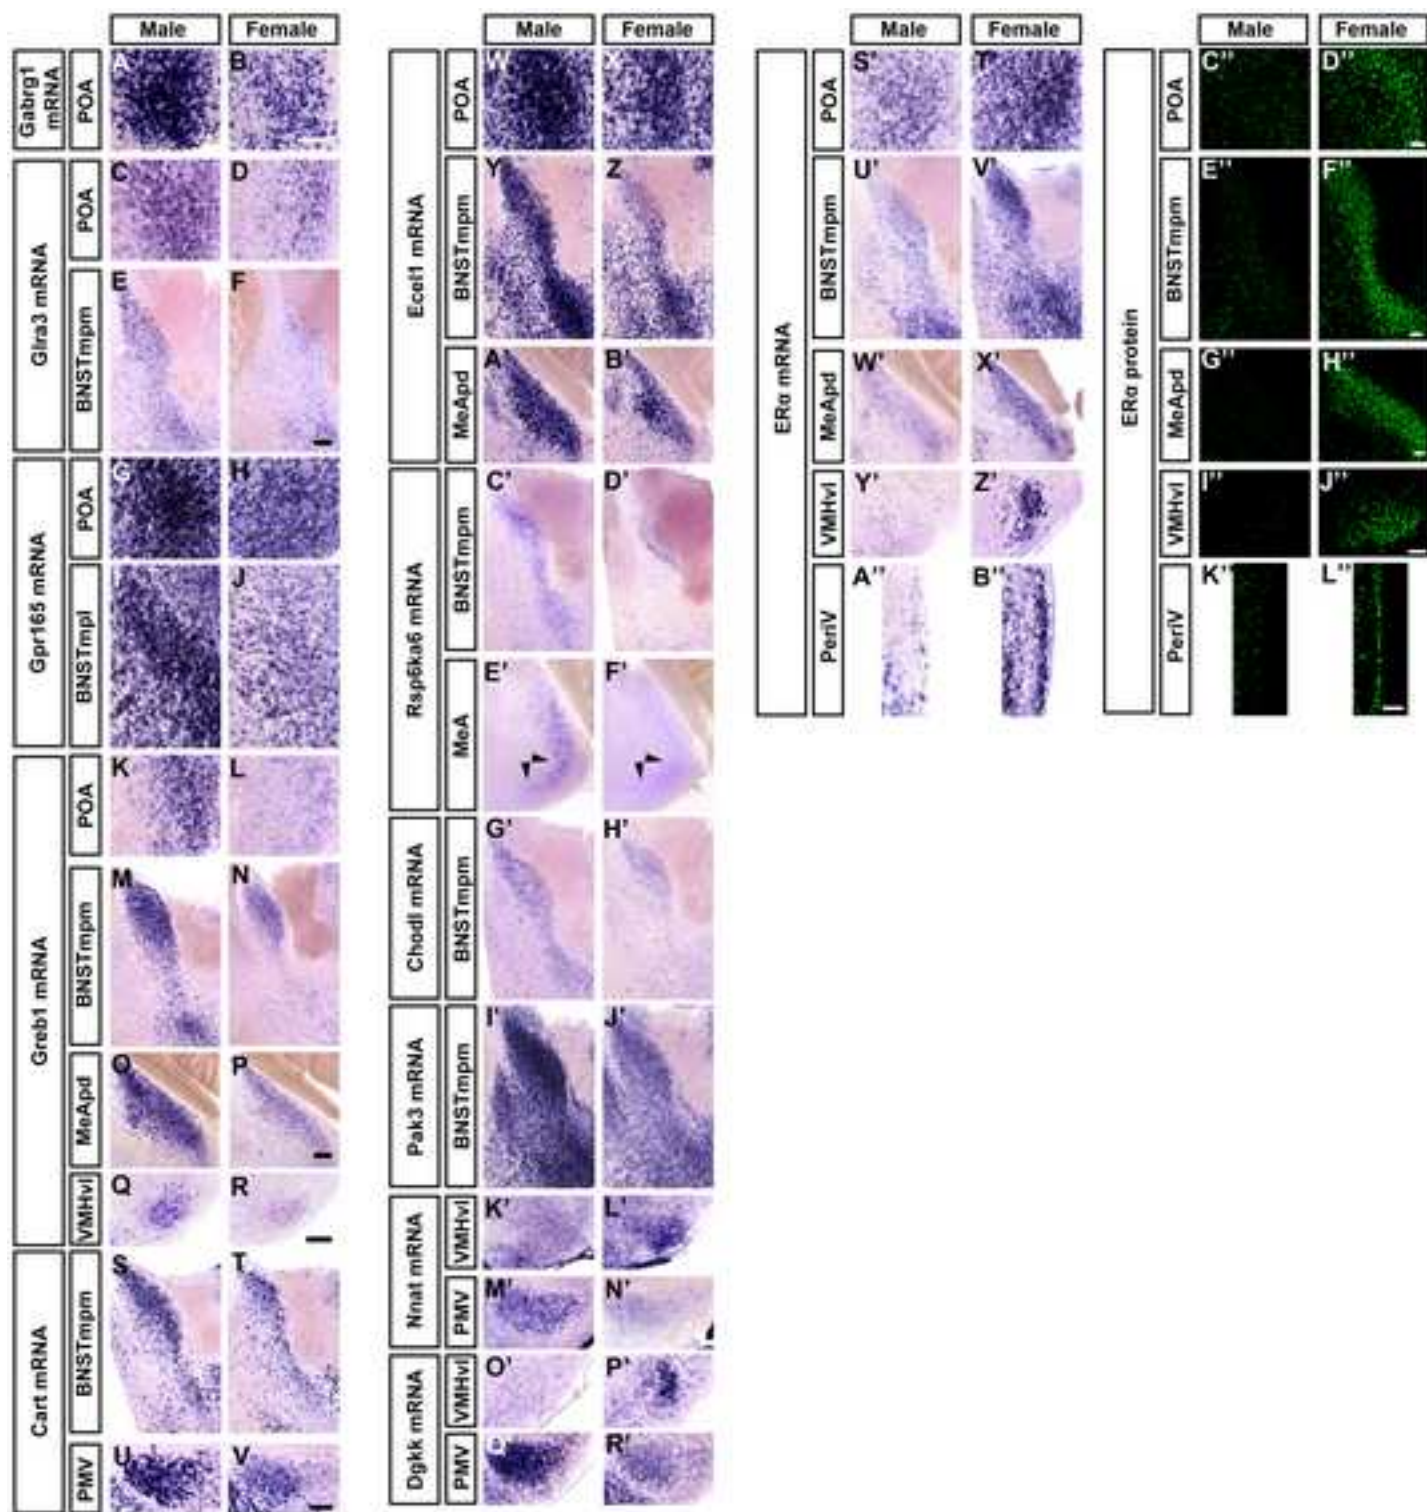



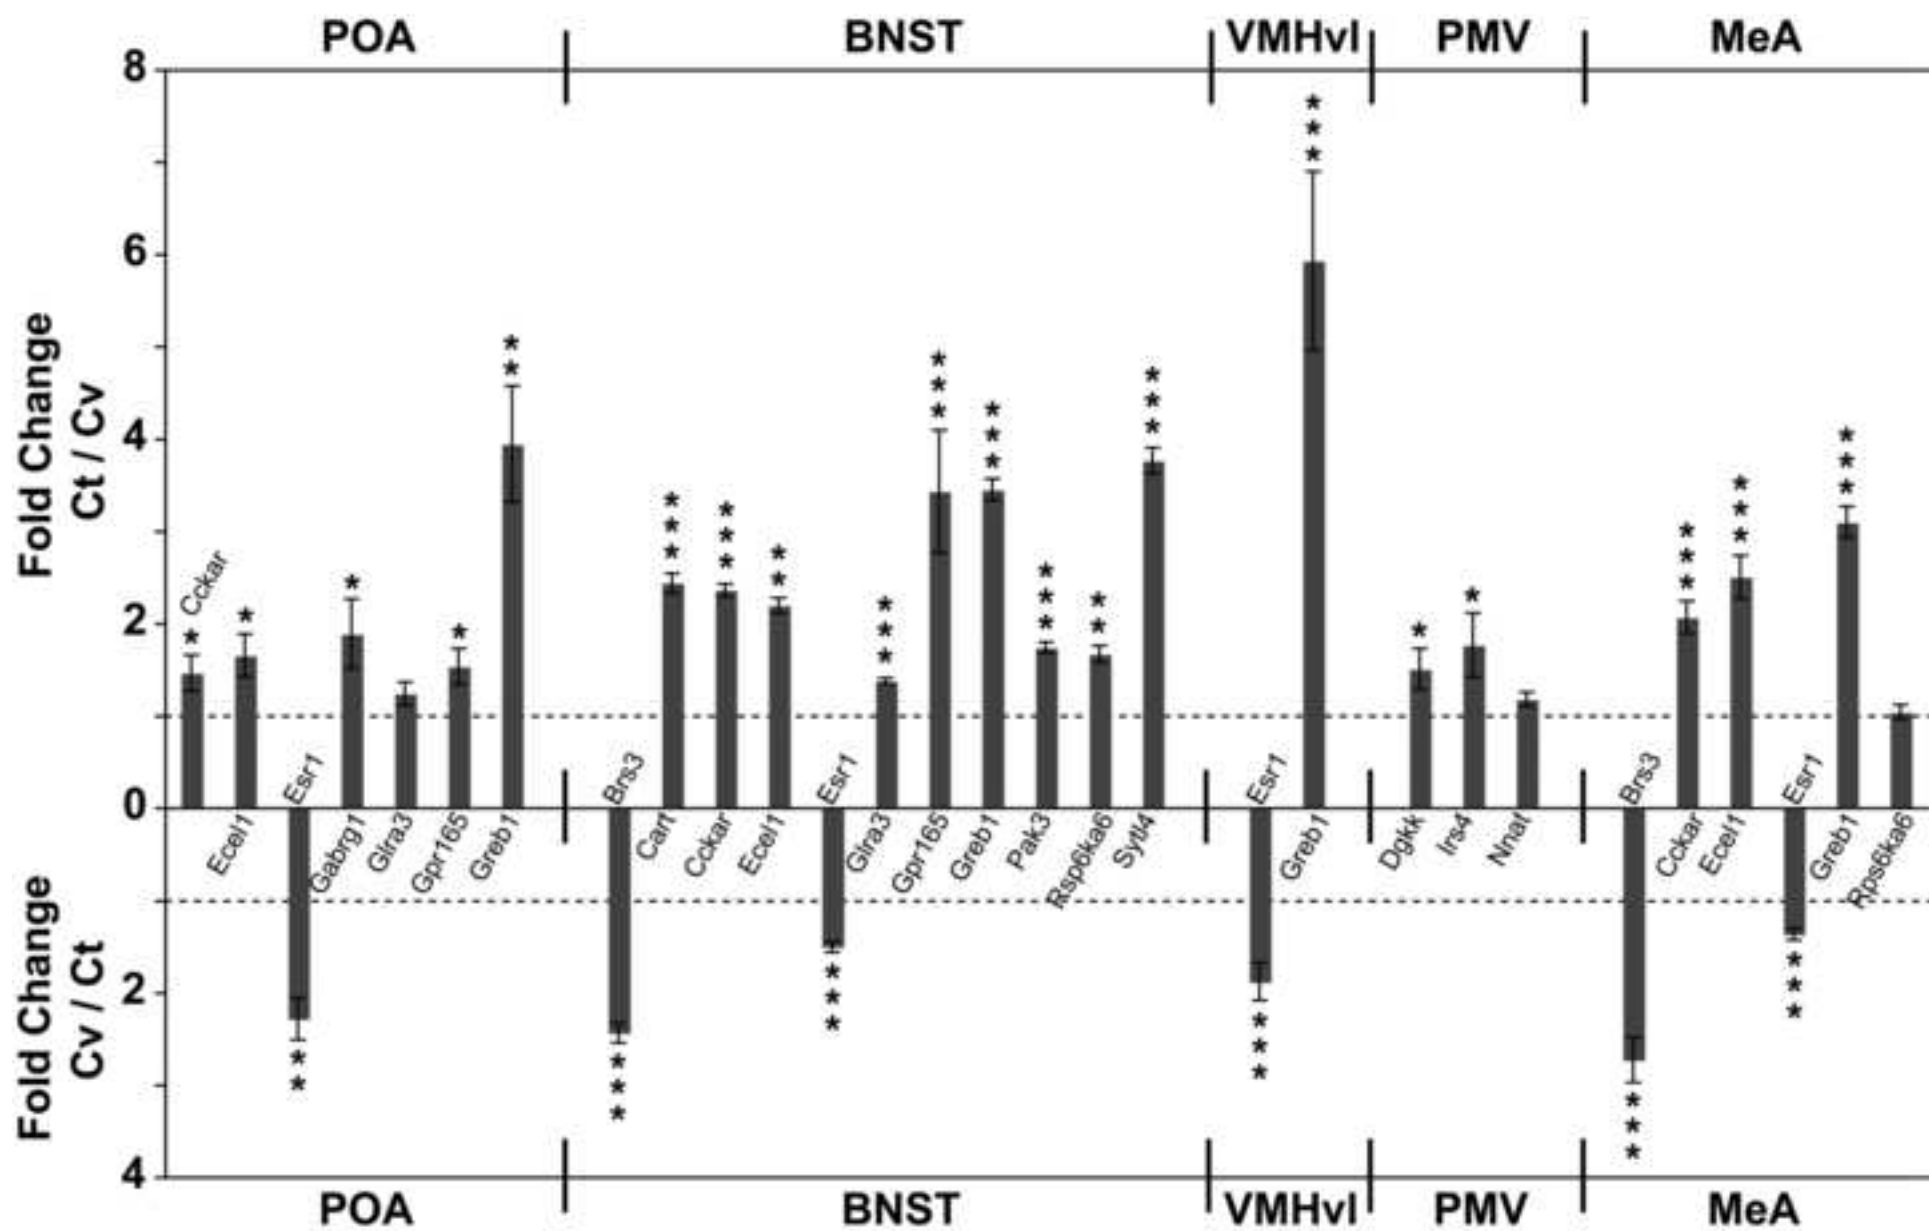

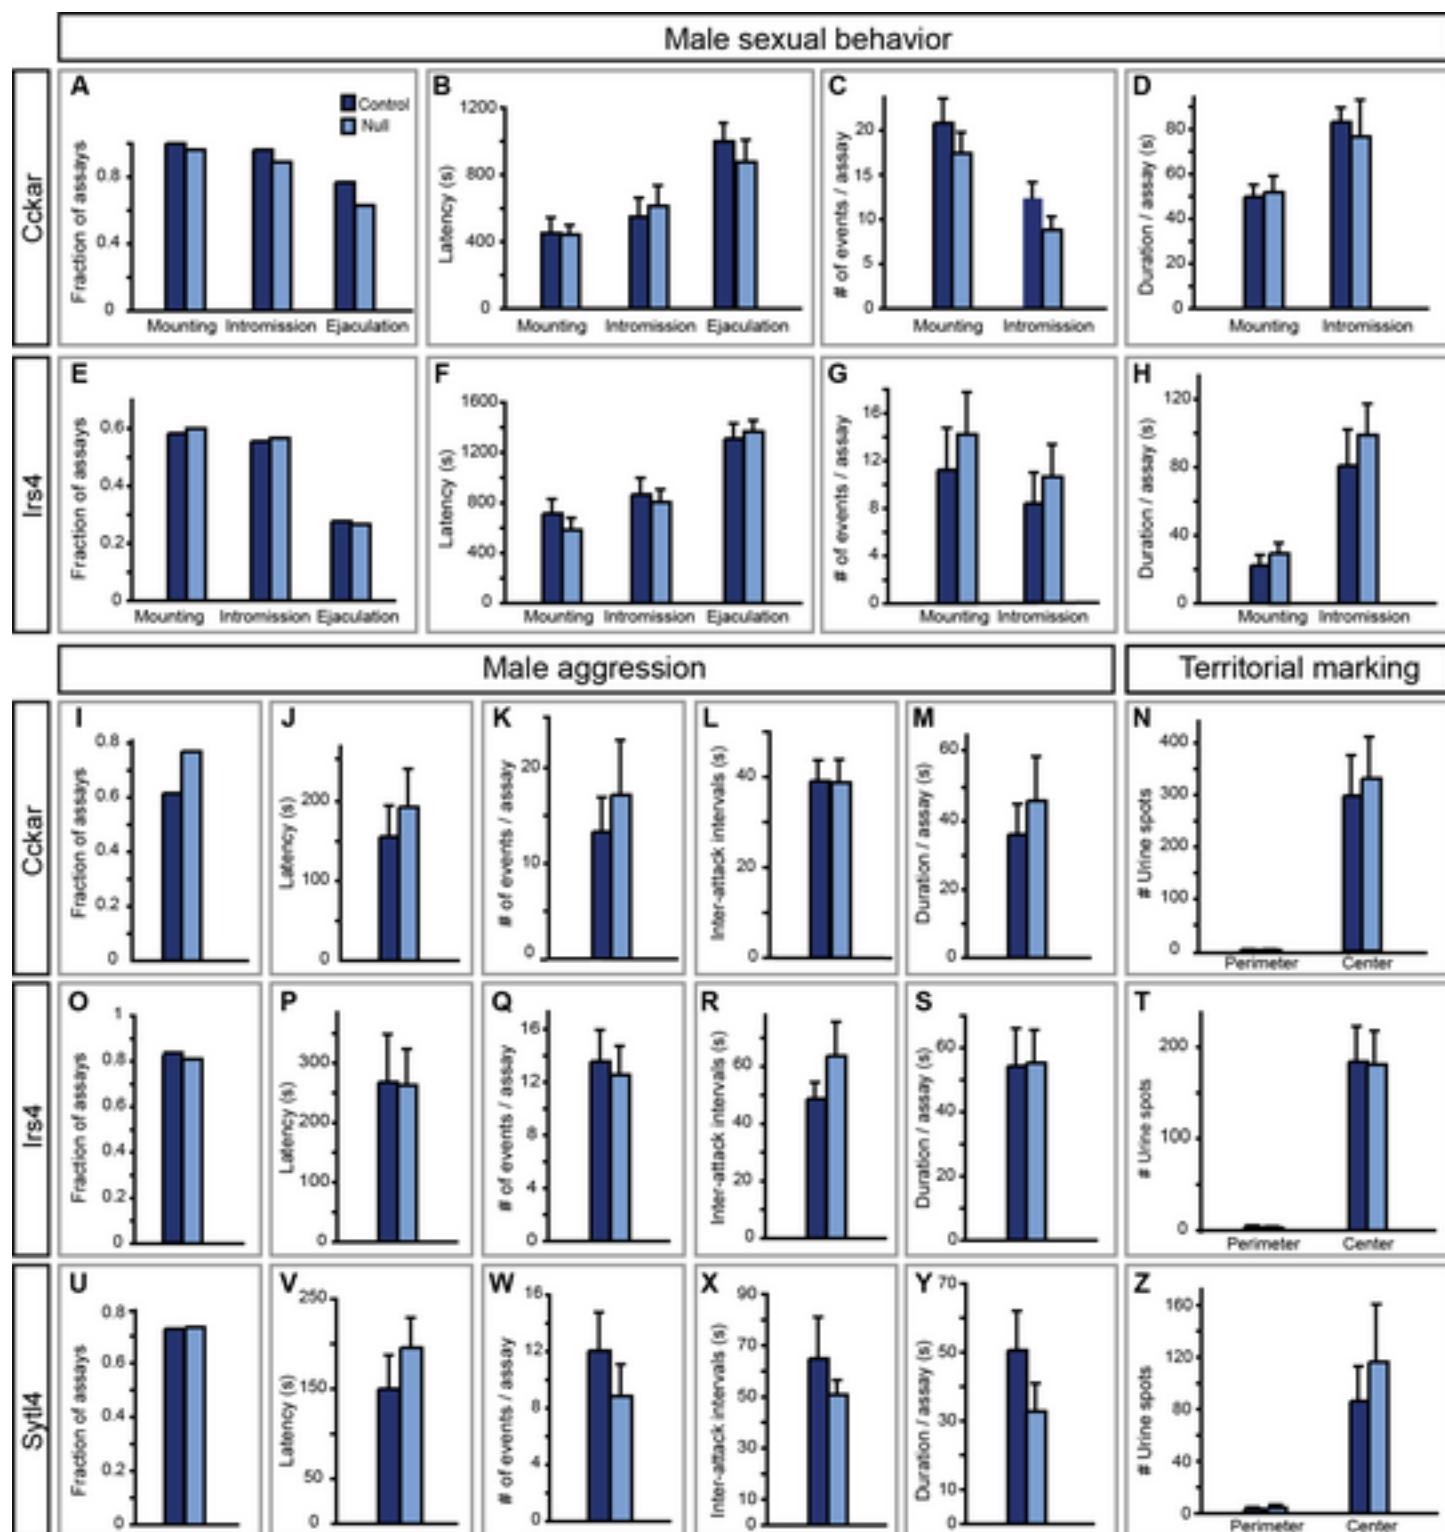

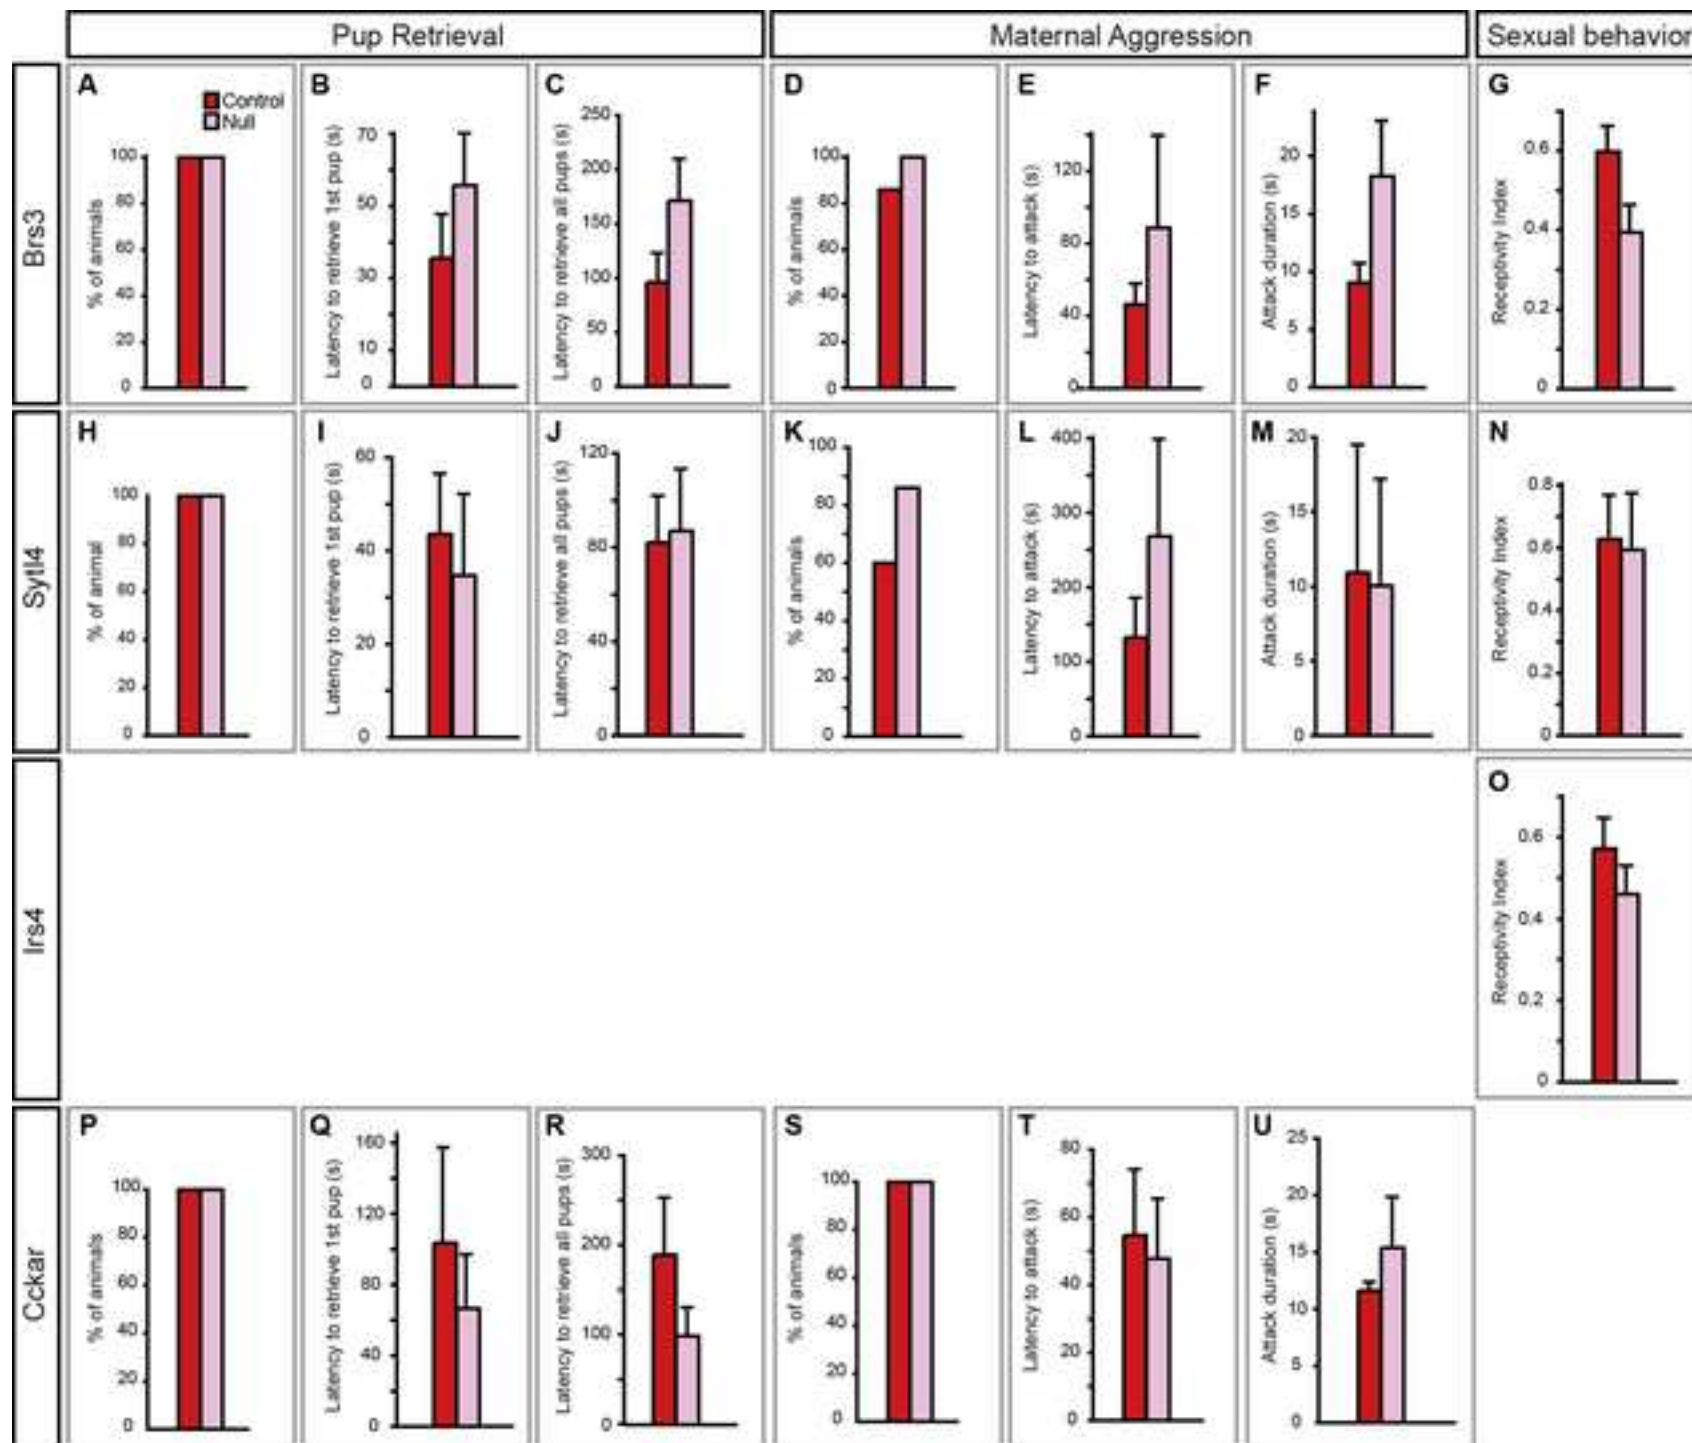



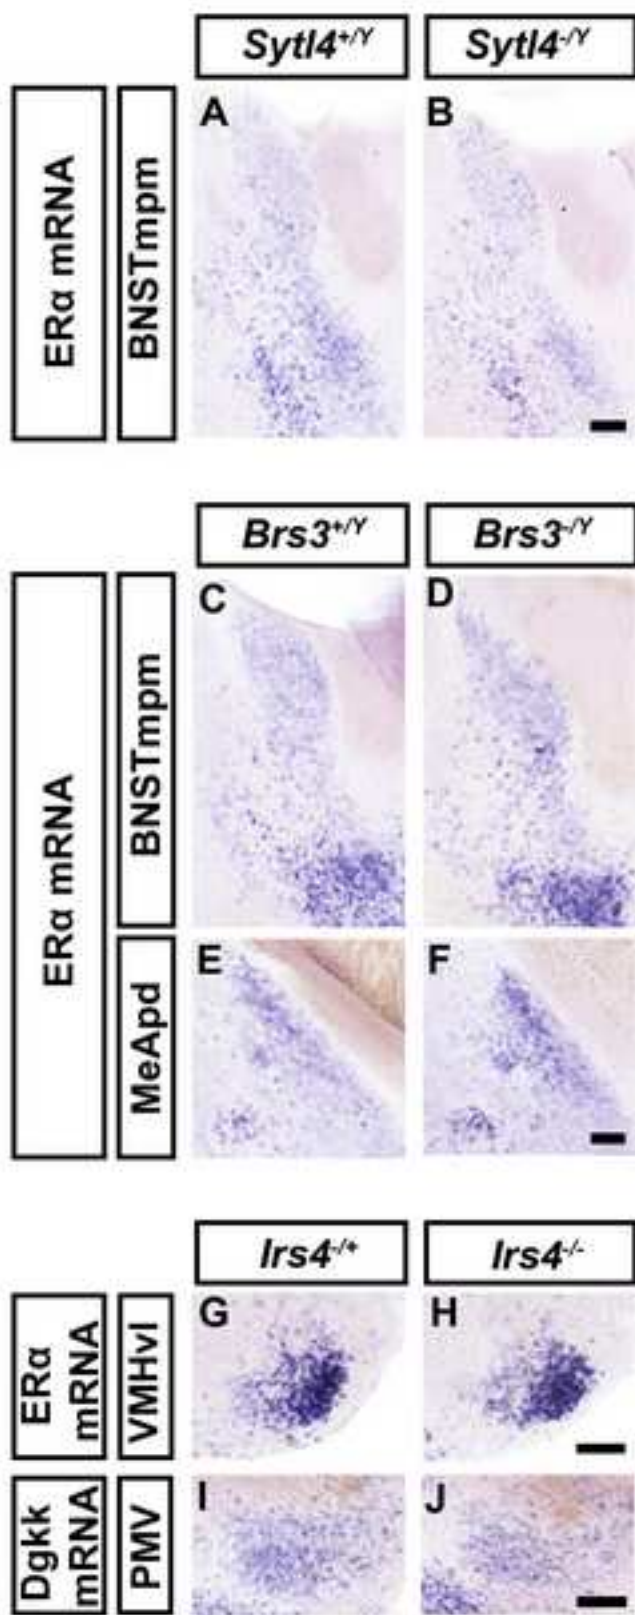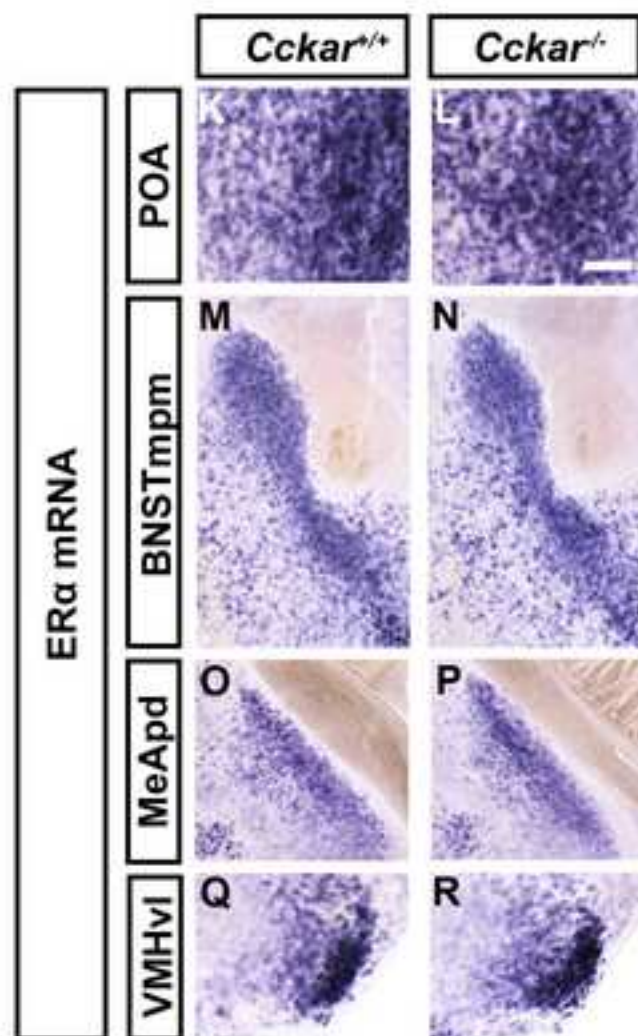

Supplement: NIHMS346592-supplement-02.pdf [file NIHMS346592-supplement-02.pdf]
